# Supplementary material
Source: PubMed Central journal article supplement (PMC3130149)
Supplement: NIHMS288732-supplement-1.pdf [file NIHMS288732-supplement-1.pdf]

Supplementary data:

| <i>Gene</i>      | <i>Entrez GeneID</i> | <i>Fold change</i> | <i>Log fold change</i> | <i>Adj. P value</i> |
|------------------|----------------------|--------------------|------------------------|---------------------|
| <i>l7Rn6</i>     | 67669                | +1.953190          | 0.965833               | 0.00221             |
| <i>H19</i>       | 14955                | +2.055409          | 1.039425               | 0.00462             |
| <i>Rhox5/Pem</i> | 18617                | +1.684209          | 0.752071               | 0.00818             |
| <i>Trpv6</i>     | 64177                | -1.685105          | -0.752829              | 0.02326             |
| <i>Daam1</i>     | 208846               | -1.842641          | -0.881775              | 0.04218             |

**Table S1** related to Figure 1: Differentially expressed genes between  $\beta$ -cat<sup>fl/fl</sup> and  $\beta$ -cat <sup>$\Delta/\Delta$</sup>  ESCs.

**a**

| <b>Gene</b> | <b>For</b>                   | <b>Rev</b>                   |
|-------------|------------------------------|------------------------------|
| Mixl1       | AGTTGCTGGAGCTCGTCTTC         | CTCCCAGATCTCCCTGAGTG         |
| Gata6       | GCCAACTGTCACACCACAAC         | CCTCTTGGTAGCACCAGCTC         |
| Gata4       | CTGTGCCAACTGCCAGACTA         | GCGATGTCTGAGTGACAGGA         |
| Gapdh       | CAAATGGGGTGAGGCCGGTGCTGAGTAT | CGGCATCGAAGGTGGAAGAGTGGGAGTT |
| Pax6        | AGGGGGAGAGAACACCAACT         | GTTGCATAGGCAGGTTGTT          |
| Fgf5        | GCGACGTTTTCTTCGTCTTC         | GAAGTGGGTGGAGACGTGTT         |
| Nestin      | GATCGCTCAGATCCTGGAAG         | GCTCTGGGAGGACACCAGTA         |
| Brachyury   | CTCTAAGGAACCACCGGTCA         | CCATTGCTCACAGACCAGAG         |
| Foxa2       | GTAAAGTATGCTGGGAGCCG         | CGCCACATAGGATGACATG          |

**b**

| <b>Gene</b> | <b>For</b>                | <b>Rev</b>              |
|-------------|---------------------------|-------------------------|
| Mixl1       | AGTTGCTGGAGCTCGTCTTC      | AGGGCAATGGAGGAAAACCTC   |
| Gata6       | ATTCACCAGCAGCGACTAGCAG    | TCCAACCTGACTTTTGATTCTCG |
| Foxa2       | GTAAAGTATGCTGGGAGCCG      | CGCCACATAGGATGACATG     |
| Brachyury   | CTCTAAGGAACCACCGGTCA      | CCATTGCTCACAGACCAGAG    |
| Cdx1        | ACGCCCTACGAATGGATG        | CTTGGTTCGGGTCTTACCG     |
| Axin2       | GCAGGAGCCTCACCTTC         | TGCCAGTTTCTTTGGCTCTT    |
| Nanog       | CCTCAGCCTCCAGCAGATGC      | CCGCTTGCACTTCACCCTTTG   |
| Oct4        | GAAGCAGAAGAGGATCACCTTG    | TTCTTAAGGCTGAGCTGCAAG   |
| Sox2        | GGCAGCTACAGCATGATGCAGGAGC | CTGGTCATGGAGTTGTACTGC   |
| Rex1        | GGCCAGTCCAGAATACCAGA      | GAACTCGCTTCCAGAACCTG    |
| Plakoglobin | CTGTGTGCCCTCTGTAAGCA      | GAACTGTCTCGCCTGAGAC     |
| Hprt        | AGCTACTGTAATGATCAGTCAACG  | AGAGGTCTTTTCACCAGCA     |

**Table S2** Primer sequences for semiquantitative PCR (a) and qPCR (b).

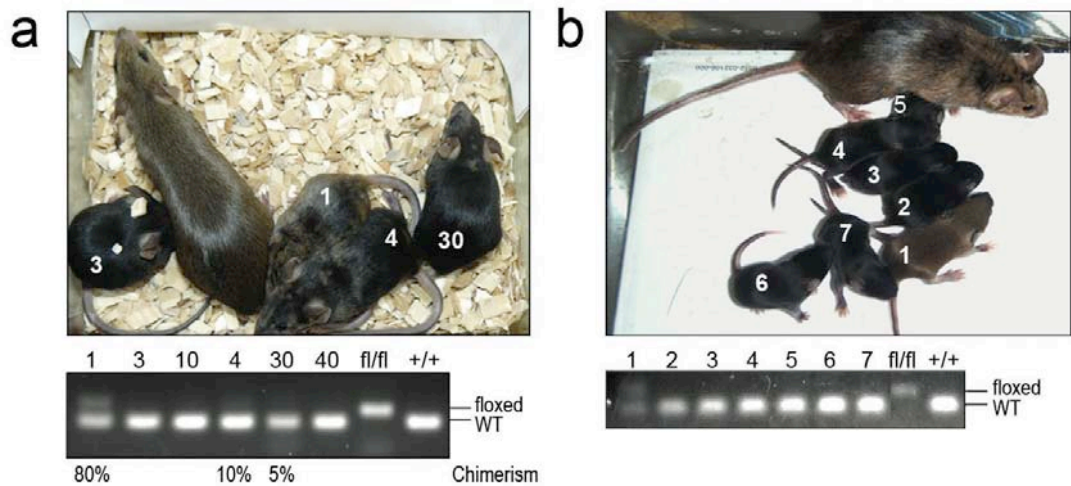

**Figure S1:** NL $\beta$ -12  $\beta$ -cat<sup>fl/fl</sup> ESCs are fully pluripotent. **(a)** Chimeras generated from blastocyst injections of NL $\beta$ -12  $\beta$ -cat<sup>fl/fl</sup> mESCs, with PCR genotyping results shown below. Estimated grade of chimerism based on coat color for the chimeric pups #1, #4 and #30 is indicated below. Note: pups #10 and #40 are not shown in the picture. **(b)** Litter from chimeric animal #1 (80% chimeric) after cross with C57Bl/6, showing for pup #1 transmission of the floxed allele through the germ line, based on coat color and genotyping PCR shown below.

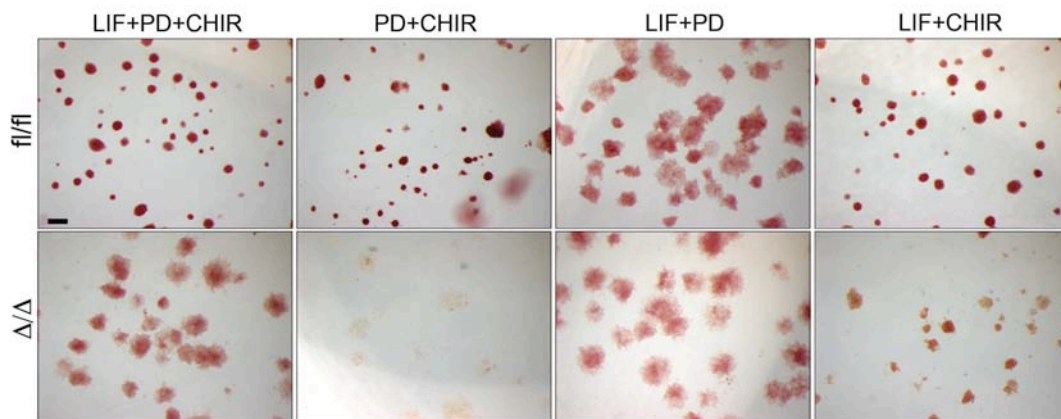

**Figure S2** Alkaline phosphatase staining on  $\beta$ -cat<sup>fl/fl</sup> and  $\beta$ -cat <sup>$\Delta\Delta$</sup>  mESCs cultured in the following media LIF+2i, 2i (PD0325901+CHIR99021), LIF+PD0325901 and LIF+CHIR99021 for 5 days. Scale bar 200  $\mu$ m.

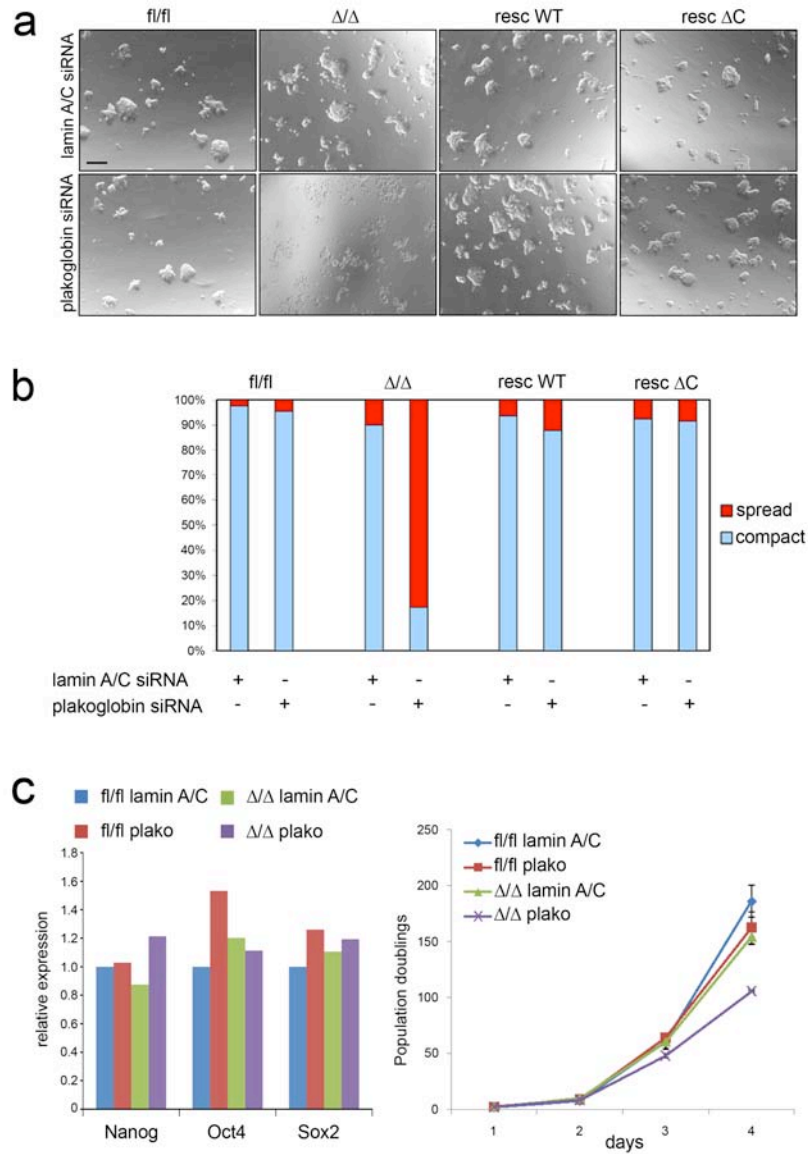

**Figure S3** Quantification of morphological changes upon control lamin A/C siRNA and plakoglobin siRNA treatment. (a) Phase contrast images of  $\beta$ -cat<sup>fl/fl</sup>,  $\beta$ -cat<sup>Δ/Δ</sup>,  $\beta$ -cat<sup>rescWT</sup> and  $\beta$ -cat<sup>rescΔC</sup> mESC cultures 48 hours after treatment with control lamin A/C or plakoglobin siRNA. Scale bar 200 μm. (b) Quantification of the percentage of mESC colonies showing morphological changes 48 hours after siRNA treatment; with their appearance being either spread (indicated by red color), similar to phase contrast image of  $\beta$ -cat<sup>Δ/Δ</sup> mESCs treated with plakoglobin siRNA shown in (A), or compact (indicated by blue color). (c) Histogram showing relative expression levels of *Nanog*, *Oct4* and *Sox2* on day 4 of culturing (n=2), and growth curve showing population doublings over 4 days of  $\beta$ -cat<sup>fl/fl</sup> and  $\beta$ -cat<sup>Δ/Δ</sup> mESC cultures treated with lamin A/C or plakoglobin siRNA performed in triplicates.

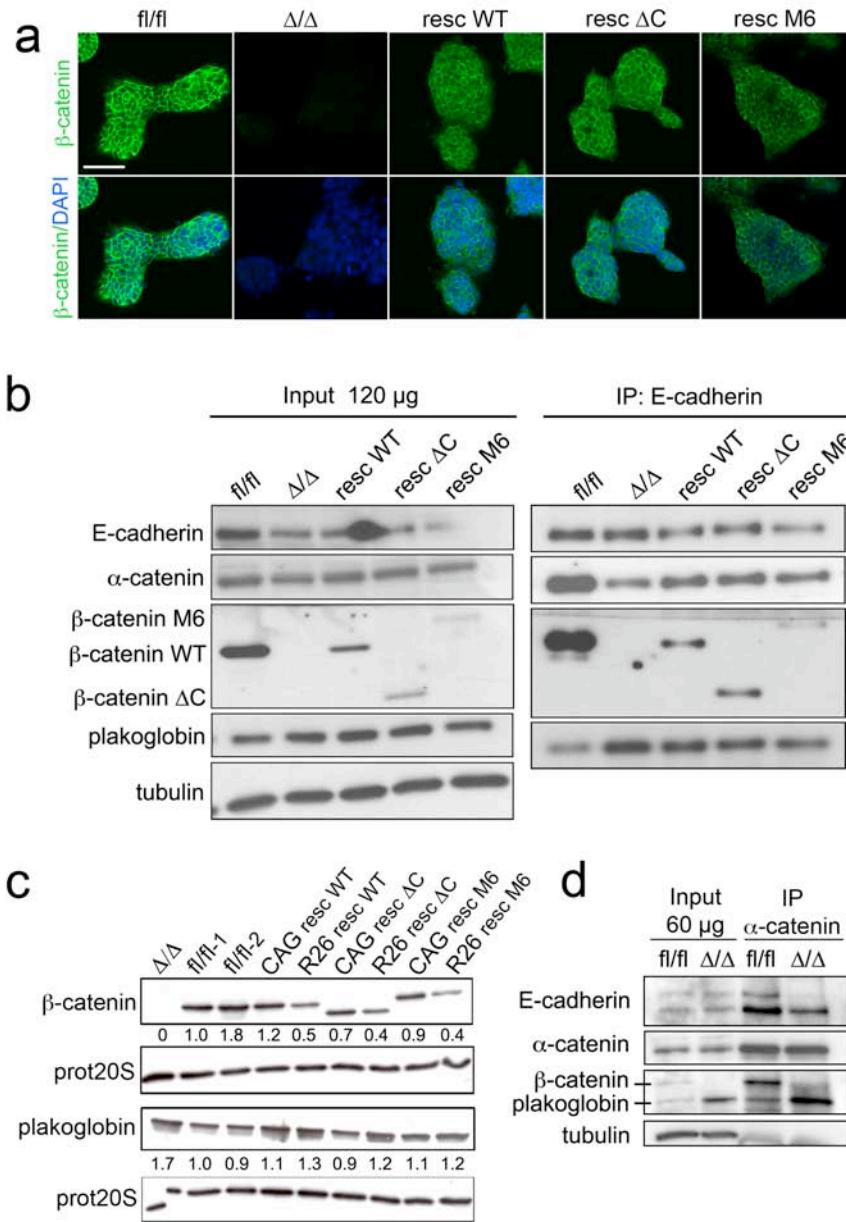

**Figure S4** Characterization of  $\beta$ -catenin rescued mESCs with regard to cell-adhesion. **(a)** Confocal images (scale bar 50  $\mu$ m) of immunofluorescent staining for  $\beta$ -catenin and  $\beta$ -catenin/DAPI on  $\beta$ -cat<sup>fl/fl</sup>,  $\beta$ -cat <sup>$\Delta/\Delta$</sup> , and Rosa26  $\beta$ -cat<sup>rescWT</sup>,  $\beta$ -cat<sup>resc $\Delta C$</sup>  and  $\beta$ -cat<sup>rescM6</sup> mESCs. **(b)** Western blot analyses for E-cadherin,  $\alpha$ -catenin,  $\beta$ -catenin (WT,  $\Delta C$ , M6), plakoglobin and tubulin showing input and E-cadherin immunoprecipitates (IP) in  $\beta$ -cat<sup>fl/fl</sup>,  $\beta$ -cat <sup>$\Delta/\Delta$</sup> ,  $\beta$ -cat<sup>rescWT</sup>,  $\beta$ -cat<sup>resc $\Delta C$</sup>  and  $\beta$ -cat<sup>rescM6</sup> mESCs. **(c)** Western blot showing  $\beta$ -catenin and plakoglobin protein levels in  $\beta$ -cat<sup>fl/fl</sup>,  $\beta$ -cat <sup>$\Delta/\Delta$</sup> , and pCAGGS and Rosa26 rescued mESCs compared to proteasome20S. **(d)** Western blot analyses for E-cadherin,  $\alpha$ -catenin,  $\beta$ -catenin, plakoglobin and tubulin showing input and  $\alpha$ -catenin immunoprecipitates in  $\beta$ -cat<sup>fl/fl</sup> and  $\beta$ -cat <sup>$\Delta/\Delta$</sup>  mESCs.

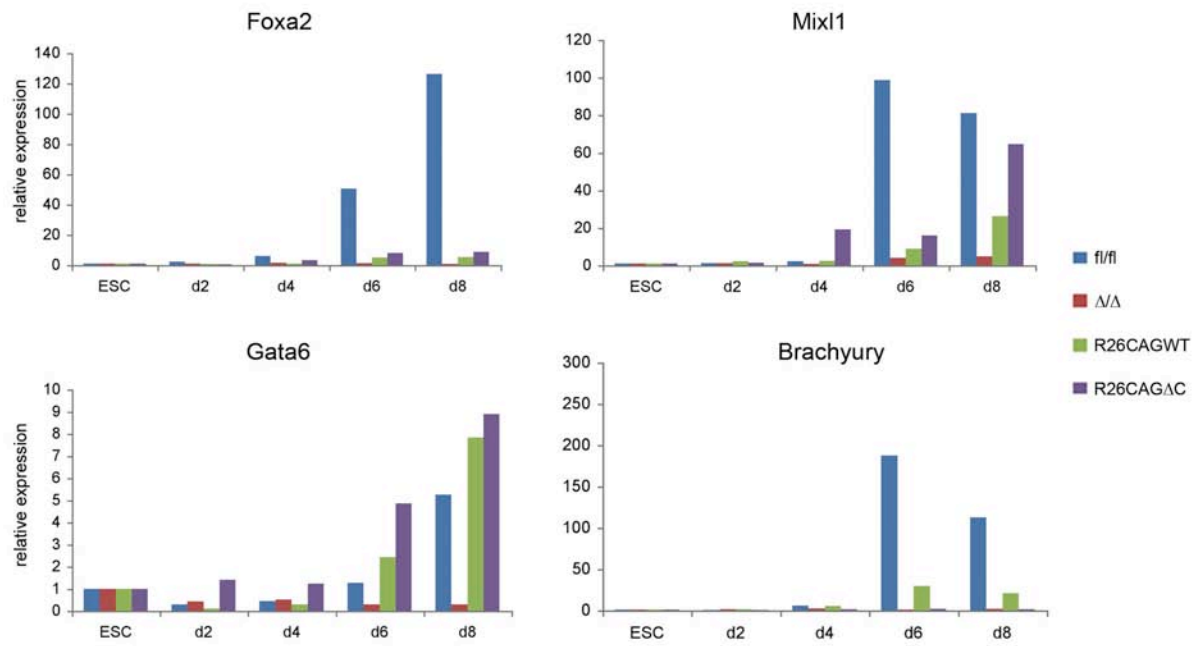

**Figure S5** (related to Figure 7a): Histograms showing relative expression levels of endodermal markers Foxa2, Mixl1, Gata6 (n=1 each) and of the mesodermal marker Brachyury (n=2) in  $\beta$ -cat<sup>fl/fl</sup>,  $\beta$ -cat<sup>ΔΔ</sup>, and Rosa26-CAG  $\beta$ -cat<sup>rescWT</sup>,  $\beta$ -cat<sup>rescΔC</sup> mESCs and during EB differentiation.

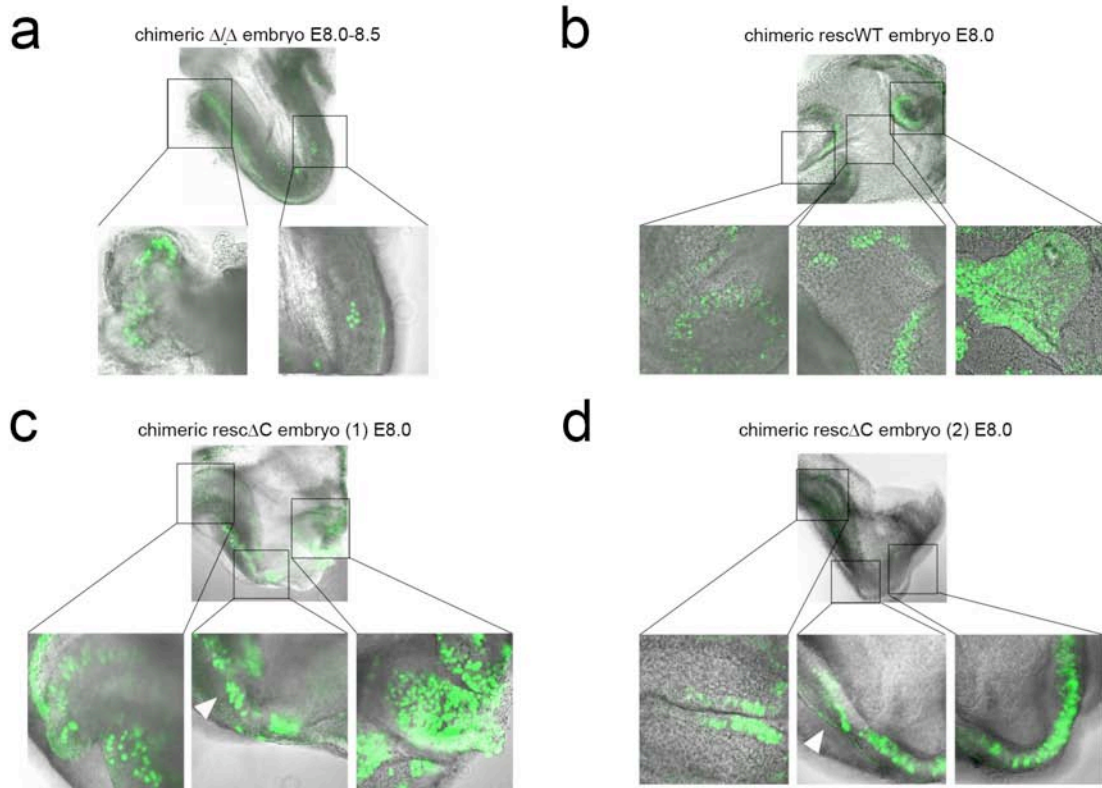

**e**

| ESC clone       | blastocysts injected | embryos recovered | E8.5 | E8.0 | E7.5 | E7.0 | GFP neg. | low <sup>1</sup> | medium <sup>2</sup> | high <sup>3</sup> |
|-----------------|----------------------|-------------------|------|------|------|------|----------|------------------|---------------------|-------------------|
| $\Delta/\Delta$ | 53                   | 24                | 14   | 7    | 1    | 2    | 10       | 11               | 2                   | 1*                |
| rescWT          | 30                   | 15                | 6    | 2    | 4    | 0    | 3        | 6                | 3                   | 3                 |
| resc $\Delta$ C | 54                   | 22                | 8    | 8    | 8    | 0    | 7        | 5                | 2                   | 8                 |

\* E6.5/7.0 embryo;

<sup>1</sup> chimeric contribution similar to example shown in a; <sup>2</sup> similar to example shown in d; <sup>3</sup> similar to examples shown in b and c.

**Figure S6** In vivo contribution analysis of mutant  $\beta\text{-cat}^{\Delta/\Delta}$ , and Rosa26  $\beta\text{-cat}^{\text{rescWT}}$ ,  $\beta\text{-cat}^{\text{resc}\Delta\text{C}}$  mESCs. Chimeric E8.0-8.5 embryos generated by injection of H2B-GFP marked mutant mESCs. Embryos are oriented head to the left, tail to the right. **(a)** Chimeric embryo showing contribution of  $\beta\text{-cat}^{\Delta/\Delta}$  mESCs primarily to the head fold, with very few GFP-positive cells in the trunk region. **(b)** Chimeric embryo showing large contribution of Rosa26  $\beta\text{-cat}^{\text{rescWT}}$  mESCs to the headfolds, trunk and tail regions. **(c,d)** Chimeric embryos showing large **(c)** and medium **(d)** contribution of Rosa26  $\beta\text{-cat}^{\text{resc}\Delta\text{C}}$  mESCs to the headfolds, trunk and tail regions. Note: low contribution or absence of GFP-positive cells in the mesoderm layer (white arrowheads in c, d). Overview image (upper images) were taken with 10x, images in the boxed regions were taken with 25x objective. **(e)** Table summarizing the data from the analyses of chimeric embryos.



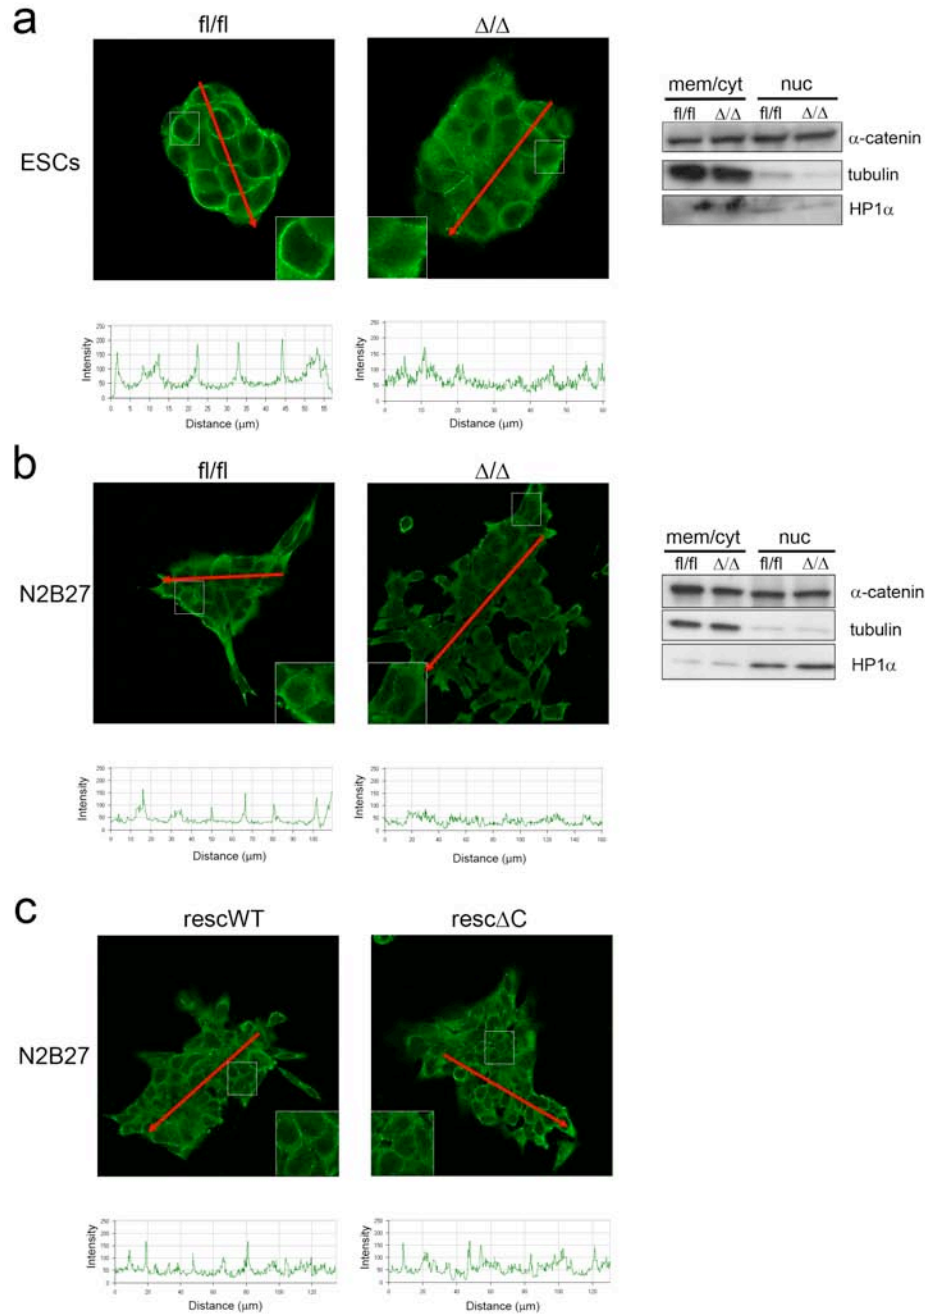

**Figure S7** Distribution of  $\alpha$ -catenin analysed by immunofluorescence and western blots. Line scan data for  $\alpha$ -catenin are shown below each image. The red arrow indicates the scanned line.

(a) Immunofluorescent staining and western blot of membranous/cytoplasmic (mem/cyt) and nuclear (nuc) fractions for  $\alpha$ -catenin of  $\beta$ -cat<sup>fl/fl</sup> and  $\beta$ -cat <sup>$\Delta/\Delta$</sup>  mESCs under serum+LIF conditions. (b) Immunofluorescent staining and western blot of membranous/ cytoplasmic (mem/cyt) and nuclear (nuc) fractions for  $\alpha$ -catenin of  $\beta$ -cat<sup>fl/fl</sup> and  $\beta$ -cat <sup>$\Delta/\Delta$</sup>  mESCs that have been differentiating for 4 days in N2B27 medium. (c) Immunofluorescent staining for  $\alpha$ -catenin in Rosa26  $\beta$ -cat<sup>rescWT</sup> and  $\beta$ -cat<sup>resc $\Delta$ C</sup> mESCs that have been differentiating for 4 days in N2B27 medium.

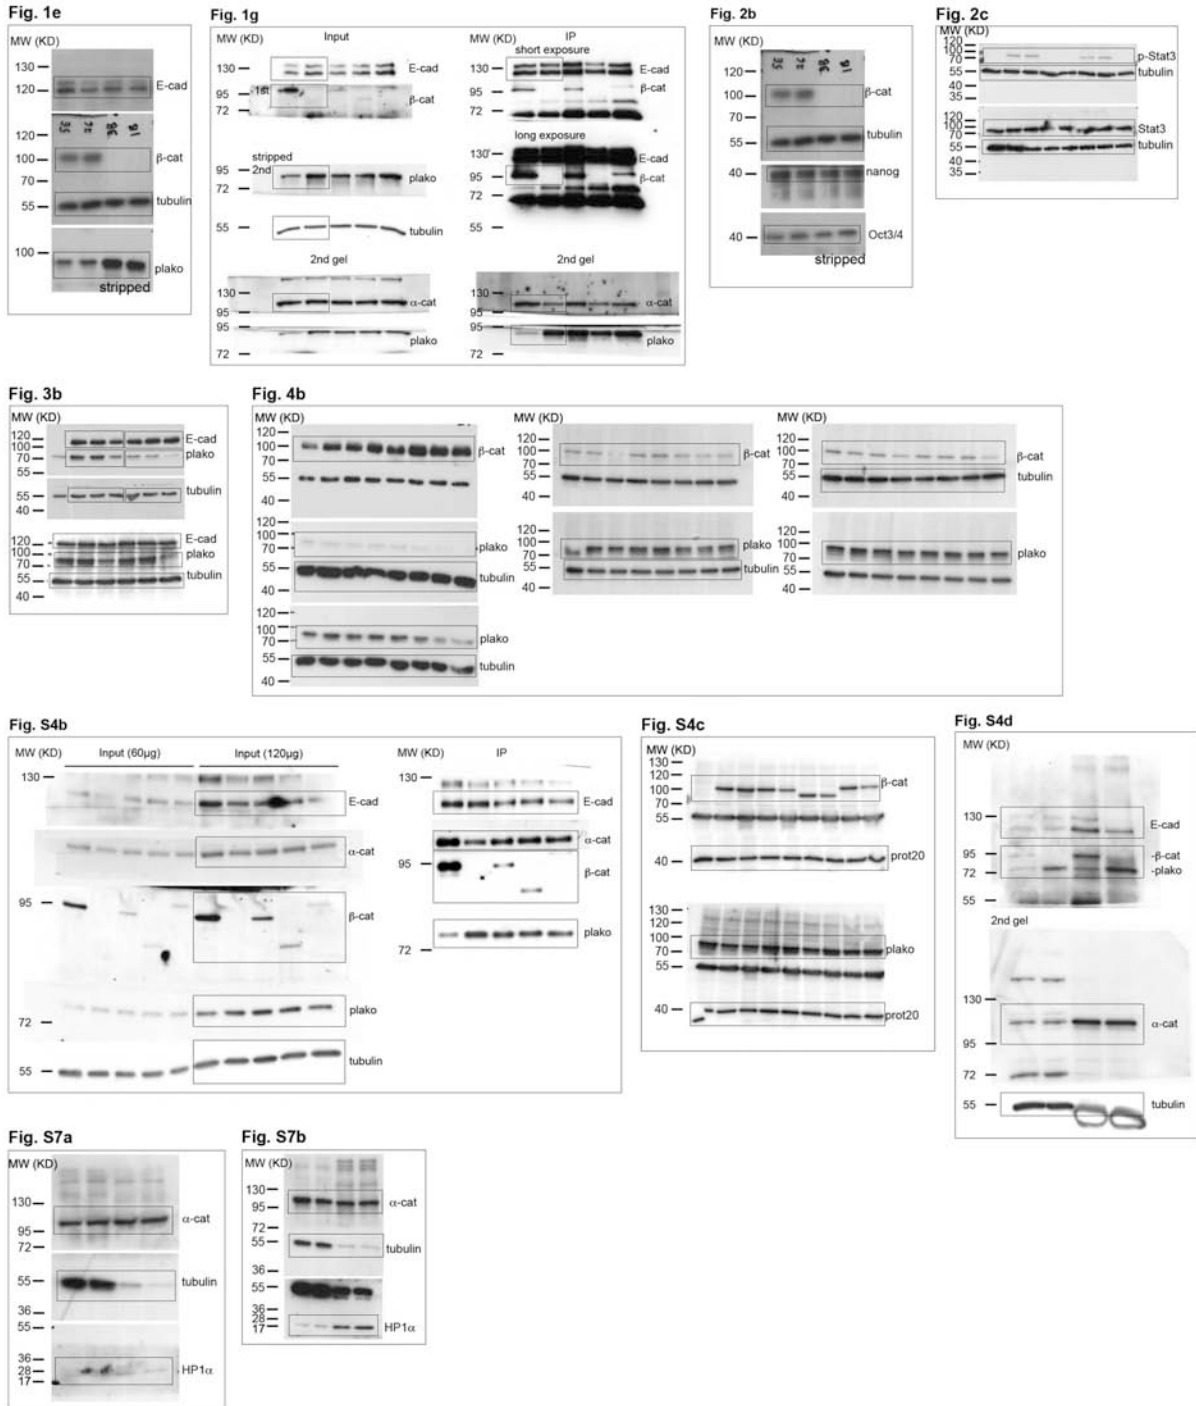

**Figure S8** Full scan data of western blots. The bands shown in the figures are indicated by the boxed regions.
